# Supplementary material for: Dispersive liquid–liquid microextraction with a deep eutectic solvent coupled with GC-MS for the determination of chiral carvone in herbaceous plants
Source: Royal Society of Chemistry journal article supplement (doi:10.1039/d4ay02002b), 2025-01-01
Supplement: d4ay02002b1.pdf [file d4ay02002b1.pdf]

1 **Dispersive liquid–liquid microextraction with deep eutectic solvent**  
2 **coupled with GC-MS for the determination of chiral carvone in**  
3 **herbaceous plants**

4 Yuluan Wu <sup>a</sup>, Ming Liang <sup>a</sup>, Yanping Xian <sup>\*a</sup>, Rongqiao Chen <sup>a</sup>, Junpeng Hu <sup>a</sup>, Hang Dai <sup>a</sup>,  
5 Chenghao Liu <sup>a</sup>, Xiangchang Hou <sup>a</sup>

6

7 <sup>a</sup> Guangzhou Quality Supervision and Testing Institute, Research Center of Risk Dynamic  
8 Detection and Early Warning for Food Safety of Guangzhou City, Key Laboratory of Detection  
9 Technology for Food Safety of Guangzhou City, Guangzhou NQI-Quality Safety Science and  
10 Technology Collaborative Innovation Center, Guangzhou 511447, China

11

12 \*Corresponding authors: Yanping Xian

13 [zjxyp2015@163.com](mailto:zjxyp2015@163.com)

14

15 Current address: No. 1-2, Zhujiang Road, Panyu District, Guangzhou, China

16 Tel: +86-20-83183575; Fax: +86-20-83183575

17

18

19

20

21 **Table S1.** Composition of the DESs.

22

| No.  | HBA              | HBD               | Water | Molar ratio |
|------|------------------|-------------------|-------|-------------|
| DES1 | choline chloride | formic acid       | /     | 1:2~1:3     |
| DES2 | choline chloride | phosphoric acid   | /     | 1:2         |
| DES3 | choline chloride | lactic acid       | /     | 1:2         |
| DES4 | choline chloride | glucose           | water | 2:1:1       |
| DES5 | choline chloride | diethylene glycol | /     | 1:2         |
| DES6 | choline chloride | glycerol          | /     | 1:2         |
| DES7 | choline chloride | diethylamine      | /     | 1:2         |

23

24

25 **Table S2.** Response surface experimental factors and level design.

| Level      | Factors                               |                     |                           |
|------------|---------------------------------------|---------------------|---------------------------|
|            | Liquid-solid ratio/mL·g <sup>-1</sup> | Extraction time/min | Extraction temperature/°C |
| -1 (Low)   | 15                                    | 20                  | 40                        |
| 0 (Center) | 20                                    | 30                  | 50                        |
| 1 (High)   | 25                                    | 40                  | 60                        |

26

27

28

29

30

31

32

33

34

35

36

37

38

39

40

41

42

43

44

45 **Table S3.** Response surface experiment results.

| No. | Liquid-solid ratio<br>/mL·g <sup>-1</sup> | Extraction<br>time/min | Extraction<br>temperature/°C | Recovery (%)      |                   |
|-----|-------------------------------------------|------------------------|------------------------------|-------------------|-------------------|
|     |                                           |                        |                              | <i>L</i> -carvone | <i>D</i> -carvone |
| 1   | 20                                        | 30                     | 50                           | 94.6              | 95.5              |
| 2   | 15                                        | 30                     | 40                           | 72.8              | 70.5              |
| 3   | 15                                        | 30                     | 60                           | 63.8              | 69.3              |
| 4   | 25                                        | 20                     | 50                           | 100.4             | 99.6              |
| 5   | 20                                        | 20                     | 60                           | 74.1              | 76.1              |
| 6   | 15                                        | 40                     | 50                           | 79.8              | 81.2              |
| 7   | 20                                        | 40                     | 60                           | 67.9              | 70.5              |
| 8   | 20                                        | 30                     | 50                           | 93.4              | 91.4              |
| 9   | 20                                        | 30                     | 50                           | 92.1              | 95.7              |
| 10  | 20                                        | 40                     | 40                           | 65.9              | 63.9              |
| 11  | 25                                        | 40                     | 50                           | 83.2              | 84.1              |
| 12  | 20                                        | 30                     | 50                           | 95.3              | 91.8              |
| 13  | 20                                        | 30                     | 50                           | 87.9              | 85.9              |
| 14  | 20                                        | 20                     | 40                           | 73.5              | 69.8              |
| 15  | 15                                        | 20                     | 50                           | 77.4              | 78.3              |
| 16  | 25                                        | 30                     | 60                           | 81.1              | 79.5              |
| 17  | 25                                        | 30                     | 40                           | 76.9              | 76.1              |

46  
 47  
 48  
 49  
 50  
 51  
 52  
 53  
 54  
 55  
 56  
 57

58 **Table S4.** ANOVA for response surface quadratic model of *L*-carvone.

| Source          | Sum of squares | df                  | Mean square | F-value | P-value Prob>F | Significance    |
|-----------------|----------------|---------------------|-------------|---------|----------------|-----------------|
| Model           | 1948.10        | 9                   | 216.46      | 34.17   | <0.0001        | significant     |
| A               | 285.60         | 1                   | 285.60      | 45.08   | 0.0003         |                 |
| B               | 102.25         | 1                   | 102.25      | 16.14   | 0.0051         |                 |
| C               | 0.61           | 1                   | 0.61        | 0.095   | 0.7663         |                 |
| AB              | 96.04          | 1                   | 96.04       | 15.16   | 0.0059         |                 |
| AC              | 43.56          | 1                   | 43.56       | 6.88    | 0.0343         |                 |
| BC              | 0.49           | 1                   | 0.49        | 0.077   | 0.7890         |                 |
| A <sup>2</sup>  | 18.22          | 1                   | 18.22       | 2.88    | 0.1338         |                 |
| B <sup>2</sup>  | 121.87         | 1                   | 121.87      | 19.24   | 0.0032         |                 |
| C <sup>2</sup>  | 1206.84        | 1                   | 1206.84     | 190.50  | <0.0001        |                 |
| Residual        | 44.35          | 7                   | 6.34        |         |                |                 |
| Lack of fit     | 10.09          | 3                   | 3.36        | 0.39    | 0.7656         | Not significant |
| Pure error      | 34.25          | 4                   | 8.56        |         |                |                 |
| Corrected total | 1992.44        | 16                  |             |         |                |                 |
| SD              | 2.52           | R <sup>2</sup>      | 0.9777      |         |                |                 |
| CV%             | 3.10           | Adj-R <sup>2</sup>  | 0.9491      |         |                |                 |
|                 |                | Pred-R <sup>2</sup> | 0.8921      |         |                |                 |

59 Note: Significant difference P<0.05, highly significant difference P<0.01

60

61

62

63

64

65

66

67

68

69

70

71 **Table S5.** ANOVA for response surface quadratic model of *D*-carvone.

| Source          | Sum of squares | df      | Mean square | F-value    | P-value | Significance    |
|-----------------|----------------|---------|-------------|------------|---------|-----------------|
| Model           | 1776.46        | 9       | 197.38      | 15.92      | 0.0007  | significant     |
| A               | 200.00         | 1       | 200.00      | 16.13      | 0.0051  |                 |
| B               | 72.60          | 1       | 72.60       | 5.85       | 0.0461  |                 |
| C               | 28.50          | 1       | 28.50       | 2.30       | 0.1733  |                 |
| AB              | 84.64          | 1       | 84.64       | 6.82       | 0.0348  |                 |
| AC              | 5.29           | 1       | 5.29        | 0.43       | 0.5345  |                 |
| BC              | 0.023          | 1       | 0.023       | 1.814E-003 | 0.9672  |                 |
| A2              | 6.50           | 1       | 6.50        | 0.52       | 0.4926  |                 |
| B2              | 106.00         | 1       | 106.00      | 8.55       | 0.0222  |                 |
| C2              | 1212.19        | 1       | 1212.19     | 97.74      | <0.0001 |                 |
| Residual        | 86.81          | 7       | 12.40       |            |         |                 |
| Lack of fit     | 23.28          | 3       | 7.76        | 0.49       | 0.7087  | Not significant |
| Pure error      | 63.53          | 4       | 15.88       |            |         |                 |
| Corrected total | 1863.28        | 16      |             |            |         |                 |
| SD              | 3.52           | R2      | 0.9534      |            |         |                 |
| CV              | 4.34           | Adj-R2  | 0.8935      |            |         |                 |
|                 |                | Pred-R2 | 0.7468      |            |         |                 |

72 Note: Significant difference  $P < 0.05$ , highly significant difference  $P < 0.01$

73

74

75

76

77

78

79

80

81 **Table S6** Comparison with other methods reported in the literature for the detection of carvone

| Analytes                                                        | Matrix                                            | Instrumental method | Pre-treatment method                                 | Linear range                                                                                                                                                                               | LOD            | Recoveries   | Precision | Reference |
|-----------------------------------------------------------------|---------------------------------------------------|---------------------|------------------------------------------------------|--------------------------------------------------------------------------------------------------------------------------------------------------------------------------------------------|----------------|--------------|-----------|-----------|
| Carvone and nitrendipine                                        | Skin diffusate and microemulsions                 | UFLC                | Direct measurement after dilution                    | 0.125-30µg/mL                                                                                                                                                                              | 0.075µg/mL     | 90-105%      | <10%      | 1         |
| Carvone, cineole, perillaldehyde, perillyl alcohol and sobrerol | The diet of laboratory animals                    | HPLC                | Extracted by 90% methanol in water                   | 1-150 µg/mL                                                                                                                                                                                | 2 µg/g         | 97.9±2.6%    | 5.5-23.3% | 2         |
| Piperine, embeline, and carvone                                 | Ayurvedic formulation catpuspadhya churna         | HPTLC               | Extracted by methanol using a Soxhlet apparatus.     | 1-9 ng/spot                                                                                                                                                                                | 0.2 ng/spot    | 100.09       | /         | 3         |
| Carvone, menthol, thymol, carvacrol and methyl salicylate       | Chicken breast                                    | GC-MS/MS            | QuEChERS                                             | 2-100 mg/L                                                                                                                                                                                 | LOQ: 2.9 µg/kg | 80-102%      | <15%      | 4         |
| Ratios of <i>d,l</i> -Carvone                                   | Caraway seeds and spearmint leaves                | HPLC                | Extracted with supercritical fluid of carbon dioxide | Caraway seeds contain only <i>d</i> -carvone and spearmint leaves contain both <i>d</i> -carvone (7%) and <i>l</i> -carvone (93%)                                                          |                |              |           | 5         |
| Chiral terpenoids                                               | Essential oil of <i>Mentha spicata</i>            | GC-FID and GC-MS    | Hydrodistilled to extract essential oils             | (S)-(+)-Carvone has been identified as the major compound in <i>M. spicata</i> essential oils                                                                                              |                |              |           | 6         |
| Composition al analysis                                         | Spearmint ( <i>Mentha spicata</i> ) essential oil | GC-MS               | Isolation of the essential oil by hydrodistillation  | The five most abundant constituents of the Iranian spearmint essential oil are (+)-carvone (73.20%), limonen (14.63%), b-bourbonene (1.13%), cineole (1.10%) and 3-terpinolenone (0.82%).  |                |              |           | 7         |
| Composition al analysis                                         | Celery ( <i>Apium graveolens</i> ) leaf and root  | GC-MS               | Extracted with liquid carbon dioxide                 | The main constituents in the oil of roots were limonene, carvone and 3n-butylphthalide. The essential oil of leaves contained higher amount of limonene, and very small amount of carvone. |                |              |           | 8         |
| <i>D</i> and <i>L</i> -Carvone                                  | Herbaceous plants                                 | GC-MS               | Extract by DES                                       | 0.5-50.0 mg/kg                                                                                                                                                                             | 8.0 mg/kg      | 83.5%-101.3% | 3.2-6.1%  | This work |

82 UFLC: ultra fast liquid chromatographic

83 HPTLC: High performance thin layer chromatography

84

## 85 References

- 86 1 R. Gannu, V. V. Yamsani, S. K. Yamsani, C. R. Palem, S. Voruganti and M. R. Yamsani, *J. Pharmaceut. Biomed.*, 2009, **50**, 1080-1084.
- 87 2 L. Tao and M. A. Pereira, *J. Chromatogr. A*, 1998, **793**, 71-76.
- 88 3 K. L. Jain, R. K. Patel and H. P. Patel, *J. AOAC Int.*, 2014, **97(3)**, 773-777.
- 89 4 F. Cozzi, I. Eder-Neuhauser, K Teichmann and M. Zaunschirm, *J. Food Drug Anal.*, 2021, **29**, 255-261.
- 90 5 M. Bounoshita, K. Hibi and H. Nakamura, *Anal. Sci.*, 1993, **9**, 425-428.
- 91 6 V. S. Pragadheesh, A. Yadav and C. S. Chanotiya, *J. Chromatogr. B*, 2015, **1002**, 30-41.
- 92 7 M. Jalali-Heravi, R. S. Moazeni-Pourasil and H. Sereshti, *Anal. Methods*, 2014, **6**, 6753-6759.
- 93 8 A. Sipailiene, P. R. Venskutonis, A Sarkinas and V. Cypiene, *Acta Horticulturae*, 2005, **677**, 71-77.
- 94
- 95
- 96
- 97
